# Supplementary material for: New insight into the evaluation of complex mixture biodegradability: an UHPLC-qToF “all-ion MS/MS” acquisition technique for the untargeted and targeted analysis of pharmaceutical formulation biodegradation
Source: Royal Society of Chemistry journal article supplement (doi:10.1039/d1va00038a), 2022-01-01
Supplement: d1va00038a1.pdf [file d1va00038a1.pdf]

SUPPORTING INFORMATION

**New insight into the biodegradability of Complex Mixtures. UHPLC-qToF “all-ion MS/MS” acquisition technique to the Untargeted Metabolite Fingerprint and Targeted Analysis**

Luisa Mattoli, Giacomo Proietti, Claudio Marzio Quintiero, Giada Fodaroni, Michela Burico, Mattia Gianni, Emiliano Giovagnoni, Valentino Mercati, Claudio Santi\*

---

|                                                                                                                              |    |
|------------------------------------------------------------------------------------------------------------------------------|----|
| Table S1: Semi-quantitative evaluation of sucralose 1, maltitol 2 and Bromhexine 3                                           | 2  |
| Table S2: List of the main compounds studied in Mixture A and Mixture B                                                      | 3  |
| Table S3. List of Bromhexine metabolites                                                                                     | 4  |
| Figure S1: Mixture A, Bromhexine metabolites at T28_ 2- and 3- and 4-[(2-Amino-3,5-dibromobenzyl)amino]cyclohexanol          | 5  |
| Figure S1A: Ambroxol                                                                                                         | 6  |
| Figure S2: Mixture_A, Bromhexine metabolites at T28_(2-amino-3,5-dibromo-benzyl)-cyclohexyl-amine                            | 7  |
| Figure S3 Mixture_A, Bromhexine metabolite at T28_ 2- and 3- and 4-[(2-amino-3,5-dibromobenzyl)-(methyl)-amino]-cyclohexanol | 8  |
| Figure S4 Mixture_A, Bromhexine metabolite at T28_ 2- and 3- and 4-[(2-amino-3,5-dibromobenzyl)-(methyl)-amino]-cyclohexenol | 9  |
| Figure S5 Mixture_A, Bromhexine metabolite at T28_2,4-dibromo-6-((cyclohex-2-en-1-yl-(methyl)-amino)-methyl)-aniline         | 10 |
| Table S4. Experimental parameters for the respirometric test                                                                 | 11 |
| Table S5. UHPLC ESI-qToF Methods: Elution gradient                                                                           | 11 |
| Table S6. UHPLC ESI-qToF Methods: MS parameters                                                                              | 11 |
| Table S7. Statistical Model performance evaluation by means of Q <sup>2</sup> and R <sup>2</sup> X                           | 11 |
| Table S8: Hotelling T <sup>2</sup> and DModX                                                                                 | 12 |
| Figure S6 Spectrum of Structure 7                                                                                            | 13 |
| Figure S7 Spectrum of Structures 7a                                                                                          | 13 |
| Figure S8 Spectrum of Structure 8                                                                                            | 14 |
| Figure S9 Spectrum of Structures 9                                                                                           | 14 |
| Figure S10 Spectrum of Structures 10                                                                                         | 15 |
| Figure S11 Spectrum of Structure 11                                                                                          | 16 |

**Table S1:** Semi-quantitative evaluation of sucralose **1**, maltitol **2** and Bromhexine **3** by Relative Ratio (RR) estimation and calculation of the reduction percentage<sup>b</sup>

| <b>Concentration</b> | <b>Sucralose (1)</b>    | <b>Maltitol (2)</b>    | <b>Bromhexine (3)</b> |
|----------------------|-------------------------|------------------------|-----------------------|
| <b>50 mg/L</b>       | RR at T0 0.049          | RR at T0 2.801         | RR at T0 0.064        |
|                      | RR at T28 0.052         | RR at T28 0.000        | RR at T28 0.004       |
|                      | <i>No % reduction</i>   | <i>100% reduction</i>  | <i>94 % reduction</i> |
| <b>100 mg/L</b>      | RR at T0 0.100          | RR at T0 4.932         | RR at T0 0.102        |
|                      | RR at T28 0.099         | RR at T28 0.000        | RR at T28 0.012       |
|                      | <i>0.56 % reduction</i> | <i>100 % reduction</i> | <i>88 % reduction</i> |
| <b>1000 mg/L</b>     | RR at T0 0.468          | RR at T0 7.049         | RR at T0 0.432        |
|                      | RR at T28 0.483         | RR at T28 4.344        | RR at T28 0.054       |
|                      | <i>No % reduction</i>   | <i>38 % reduction</i>  | <i>88 % reduction</i> |
| <b>Bromhexine</b>    |                         |                        | RR at T0 17.826       |
| <b>0.7mg/L</b>       |                         |                        | RR at T28 9.542       |
|                      |                         |                        | <i>46 % reduction</i> |

<sup>b</sup> The Relative Ratio (RR) is the ratio between the area counts of the compound and the area count of the internal standard (sulfadimethoxine-d6). The level of reduction at the end of the experiment is the ratio between the RR at T28 and the RR at T0 as a percentage.

Table S2. List of the main compounds studied in Mixture\_A and Mixture\_B

| N° | Compounds                     | Structure/ elemental formula                                                                                                                          | Retention time (min) | Type of ionization | Calculated Mass [M-X] <sup>-</sup> or [M+X] <sup>+</sup> (m/z) (i) | Accurate Mass [M-X] <sup>-</sup> or [M+X] <sup>+</sup> (m/z) (ii) | Error (mDa) (a) | Score% (b) | Calculated mass-Fragment (m/z) (c) | Accurate mass-Fragment (m/z) (c)         | Level of compound identification (d) | Products studied |
|----|-------------------------------|-------------------------------------------------------------------------------------------------------------------------------------------------------|----------------------|--------------------|--------------------------------------------------------------------|-------------------------------------------------------------------|-----------------|------------|------------------------------------|------------------------------------------|--------------------------------------|------------------|
| 1  | Sucralose                     | 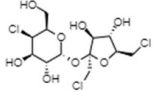<br>C <sub>12</sub> H <sub>19</sub> Cl <sub>3</sub> O <sub>8</sub> . | 4,509                | Pos                | 419,0038<br>[M+Na] <sup>+</sup>                                    | 419,0045<br>[M+Na] <sup>+</sup>                                   | 7               | 98.9       | <b>238,9848*</b>                   | <b>238,9846*</b><br>(CE30eV)             | Level 1                              | Mixture_A        |
| 2  | Maltitol                      | <br>C <sub>12</sub> H <sub>24</sub> O <sub>11</sub>                  | 0,772                | Pos                | 367,1211<br>[M+Na] <sup>+</sup>                                    | 367,1218<br>[M+Na] <sup>+</sup>                                   | 7               | 96.0       | 205,0683                           | <b>205,0685</b><br>(CE30eV)              | Level 1                              | Mixture_A        |
| 3  | Bromhexine                    | <br>C <sub>14</sub> H <sub>20</sub> Br <sub>2</sub> N <sub>2</sub>   | 9,655                | Pos                | 377,0046<br>[M+H+2] <sup>+</sup>                                   | 377,0048<br>[M+H+2] <sup>+</sup>                                  | 2               | 98.2       | 263,8841*<br><b>114,1277</b>       | 263,8843*<br><b>114,1280</b><br>(CE30eV) | Level 1                              | Mixture_A        |
| 4  | Sucrose                       | <br>C <sub>12</sub> H <sub>22</sub> O <sub>11</sub>                  | 0,922                | Neg                | 341,1089<br>[M-H] <sup>-</sup>                                     | 341,1092<br>[M-H] <sup>-</sup>                                    | 3               | 89.3       | 185,0415,<br><b>203,0518</b>       | 185,0415*<br><b>203,0518</b><br>(CE30eV) | Level 1                              | Mixture_B        |
| 5  | Acteoside (syn. Verbascoside) | <br>C <sub>29</sub> H <sub>36</sub> O <sub>15</sub>                  | 6,508                | Neg                | 623,1981<br>[M-H] <sup>-</sup>                                     | 623,1981<br>[M-H] <sup>-</sup>                                    | 0               | 79.9       | <b>161,0243</b><br>461,1664*       | <b>161,0243</b><br>461,1658*<br>(CE30eV) | Level 1                              | Mixture_B        |
| 6  | Grindelic Acid                | <br>C <sub>20</sub> H <sub>32</sub> O <sub>3</sub>                 | 18,898               | Neg                | 319,2279<br>[M-H] <sup>-</sup>                                     | 319,2281<br>[M-H] <sup>-</sup>                                    | 2               | 83.3       | 205,1596*                          | <b>205,1596*</b><br>(CE30eV)             | Level 1                              | Mixture_B        |

(a) Mass Difference between calculated mass or exact mass and the experimental value; (b) The reported value is the overall score to which contribute: the mass score, the isotope abundance score, the isotope spacing score and the retention time score; (c) Bold more abundant ions, asterisk qualifier ions. (d) Classification according to Sumner et al. <sup>1</sup>Level 1- validate identification with pure reference standard, Level 2- Putative identified compound MS/MS data match with the literature, Level 3- tentative structure identification match with the molecular formula; i) Mono isotopic mass of the most abundant ion of the isotopic cluster (ii) Accurate mass Value of the most abundant ion of the isotopic cluster

<sup>1</sup> Sumner LW, Amberg A, Barrett D, Beale MH, Beger R, Daykin CA, Fan TW, Fiehn O, Goodacre R, Griffin JL, Hankemeier T, Hardy N, Harnly J, Higashi R, Kopka J, Lane AN, Lindon JC, Marriott P, Nicholls AW, Reilly MD, Thaden JJ, Viant MR. Proposed minimum reporting standards for chemical analysis Chemical Analysis Working Group (CAWG) Metabolomics Standards Initiative (MSI). *Metabolomics* 2007; 3: 211-221.

Table S3. List of Bromhexine metabolites

| N° | Compound Name                                                                                                                                                                                              | Retenti on time (min)      | Putative Structure/ elemental formula                                                                     | Type of ionization | Calculated Mass [M-X] <sup>-</sup> or [M+X] <sup>+</sup> m/z (ii) | Accurate Mass [M-X] <sup>-</sup> or [M+X] <sup>+</sup> (m/z) (iii) | Error (mDa) (a) | Calculated Mass m/z (c) | Accurate mass-Fragment m/z (c)                                                                            | Level of compound identification (d) |
|----|------------------------------------------------------------------------------------------------------------------------------------------------------------------------------------------------------------|----------------------------|-----------------------------------------------------------------------------------------------------------|--------------------|-------------------------------------------------------------------|--------------------------------------------------------------------|-----------------|-------------------------|-----------------------------------------------------------------------------------------------------------|--------------------------------------|
| 7  | Ambroxol (E-4-HDMB)                                                                                                                                                                                        | 6,146                      | 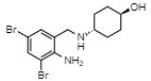<br><b>C13H18Br2N2O</b>  | Pos                | 378,9839<br>[M+H+2] <sup>+</sup>                                  | 378,9836<br>[M+H+2] <sup>+</sup>                                   | -3              | 263,8841<br>116,1074    | <b>263,8841*</b><br>116,1069                                                                              | Level 1                              |
| 7° | [(2-amino-3,5 dibromobenzyl)-amino]-cyclohexanol<br><br>(Other Ambroxol isomers with OH in different position on amino cyclohexane ring)                                                                   | 6,738;<br>7,094            | <br><b>C13H18Br2N2O</b>  | Pos                | 378,9839<br>[M+H+2] <sup>+</sup>                                  | 378,9836<br>378,9833<br>[M+H+2] <sup>+</sup>                       | -3<br>-6        | 263,8841<br>116,1074    | <b>263,8841*</b><br>116,1069<br><b>263,8842*</b><br>116,1068<br>(CE30eV)                                  | Level 2                              |
| 8  | (2-amino-3,5-dibromo-benzyl)-cyclohexyl-amine                                                                                                                                                              | 9,633                      | <br><b>C13H18Br2N2</b>   | Pos                | 362,9889<br>[M+H+2] <sup>+</sup>                                  | 362,9892<br>[M+H+2] <sup>+</sup>                                   | 3               | 263,8841<br>100,1121    | <b>263,8841*</b><br>110,1119<br>(CE30eV)                                                                  | Level 3                              |
| 9  | [(2-amino-3,5-dibromobenzyl)-(methyl)-amino]-cyclohexanol,<br><br>(Different isomers with OH in different position on amino cyclohexane ring)                                                              | 6,061;<br>6,924;<br>10,191 | <br><b>C14H20Br2N2O</b>  | Pos                | 392,9995<br>[M+H+2] <sup>+</sup>                                  | 392,9996<br>392,9998<br>393,0003<br>[M+H+2] <sup>+</sup>           | 1<br>3<br>8     | 263,8841<br>130,1226    | <b>263,88342*</b><br>130,1226<br><b>263,8839*</b><br>130,1227<br><b>263,8844*</b><br>130,1228<br>(CE30eV) | Level 3                              |
| 10 | [(2-amino-3,5-dibromobenzyl)-(methyl)-amino]-cyclohexenol,<br><br>(different isomers with OH in different position on the cyclohexane ring; a double bond in the cyclohexane ring in not defined position) | 6,315;<br>6,738;<br>9,108  | <br><b>C14H18Br2N2O</b>  | Pos                | 390,9839<br>[M+H+2] <sup>+</sup>                                  | 390,9840<br>390,9843<br>390,9840<br>[[M+H+2] <sup>+</sup>          | 1<br>4<br>1     | 263,8841<br>128,1070    | <b>263,8847*</b><br>128,1067<br><b>263,8841*</b><br>128,1068<br><b>263,8839*</b><br>128,1068<br>(CE30eV)  | Level 3                              |
| 11 | 2,4-dibromo-6-((cyclohex-2-en-1-yl)-(methyl)-amino)-methyl-aniline<br><br>(double bond in the cyclohexane ring position not defined)                                                                       | 9,430                      | <br><b>C14H18Br2N2</b> | Pos                | 374,9890<br>[M+H+2] <sup>+</sup>                                  | 374,9890<br>[M+H+2] <sup>+</sup>                                   | 0               | 263,8841<br>112,1121    | <b>263,8839*</b><br>112,1123<br>(CE30eV)                                                                  | Level 3                              |

iii) Normalized value obtained by the ratio of the area of the compound to the area of the internal standard.

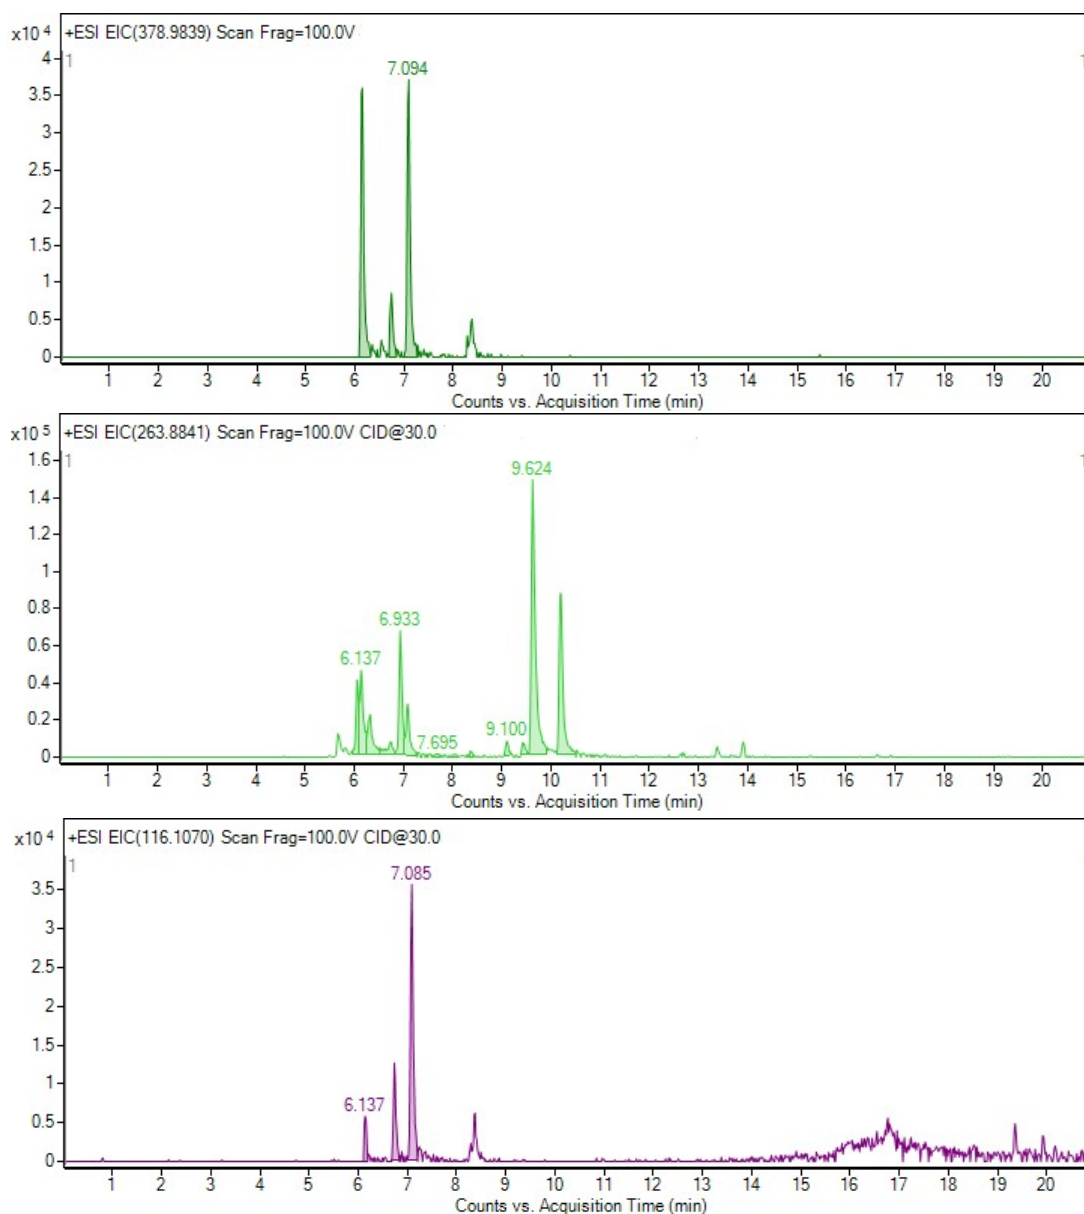

**Figure S1** Mixture\_A: Bromhexine metabolites at T28\_2- and 3- and 4-[(2-Amino-3,5-dibromobenzyl)amino]cyclohexanol\_ EIC of the molecular ion at m/z 378.9839 (green line,  $[[M+H+2]^+$ ), and its fragments EICs at m/z 263.8841(30eV, light green line) and m/z 116.1070 (violet line). Different signals can be observed as consequence of microfauna hydroxylation on different position of amino-cyclohexane ring. **Ambroxol** or **trans-4-[(2-Amino-3,5-dibromobenzyl)amino]cyclohexanol (7)** can be easily identified at **6.146** minutes by comparison with the retention time, accurate mass and accurate MS/MS fragments of the reference pure standard (see **Figure S1A**)

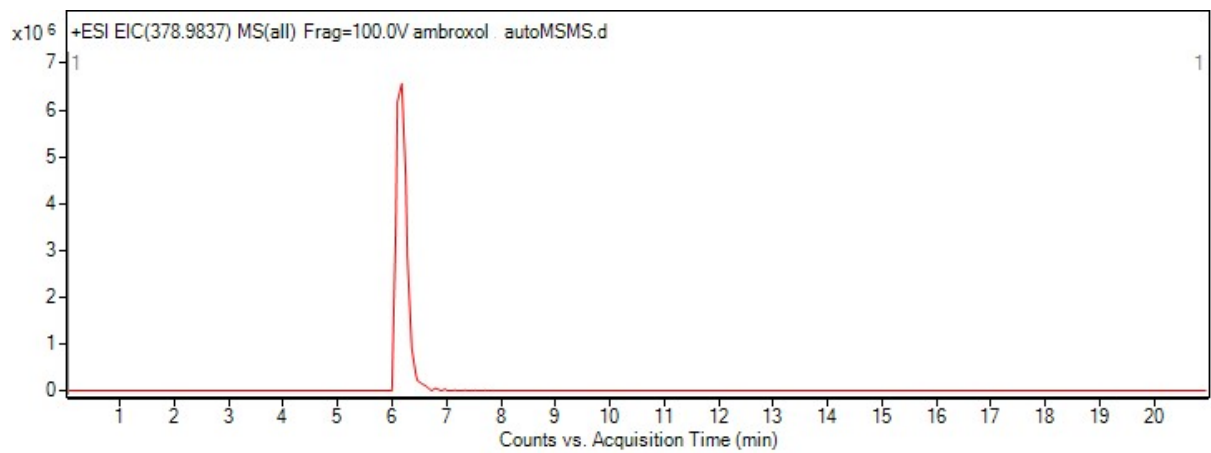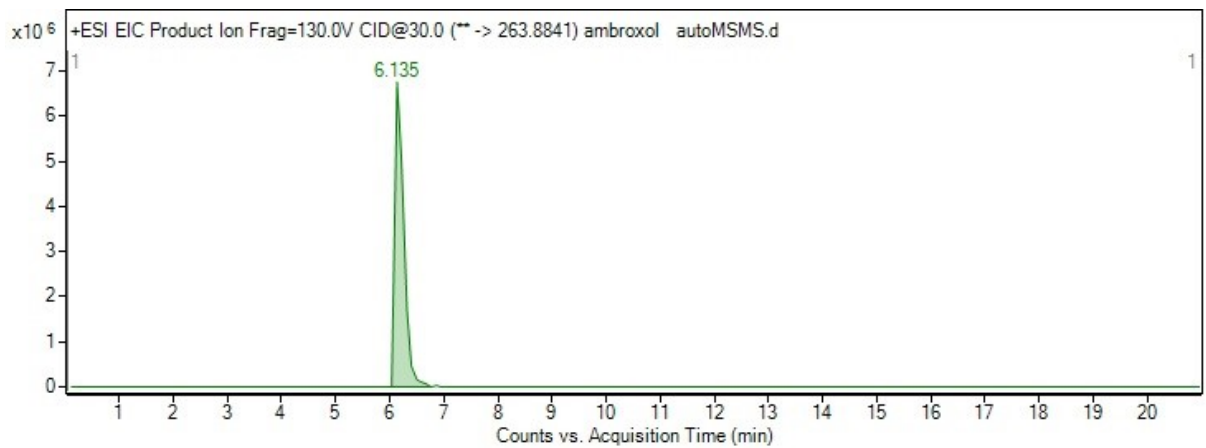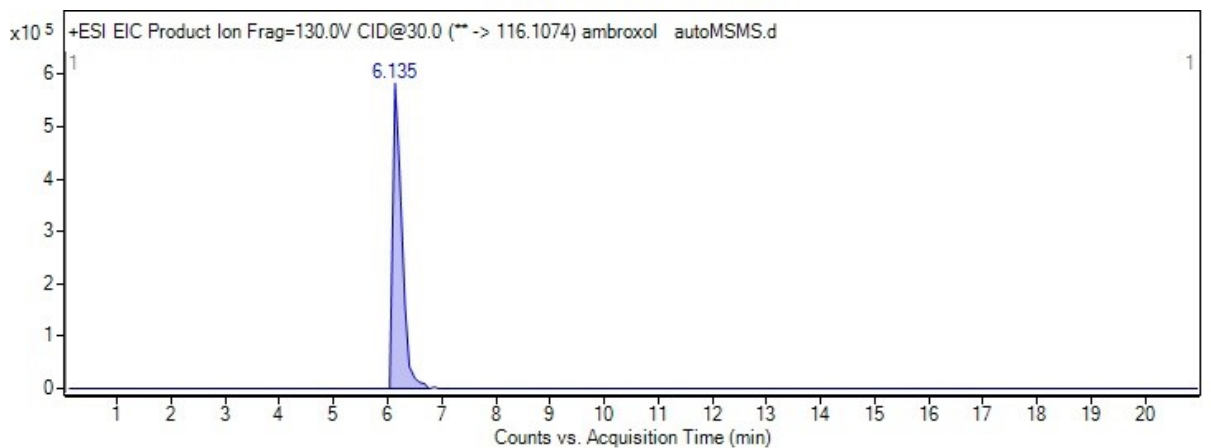

Figure S1A: *trans*-4-[(2-Amino-3,5-dibromobenzyl)amino]cyclohexanol, or Ambroxol, reference pure standard, EIC at  $m/z$  378.9839 (red line), at  $m/z$  263.8841(30eV, green line), and  $m/z$  116.1070 (30eV, blue line).

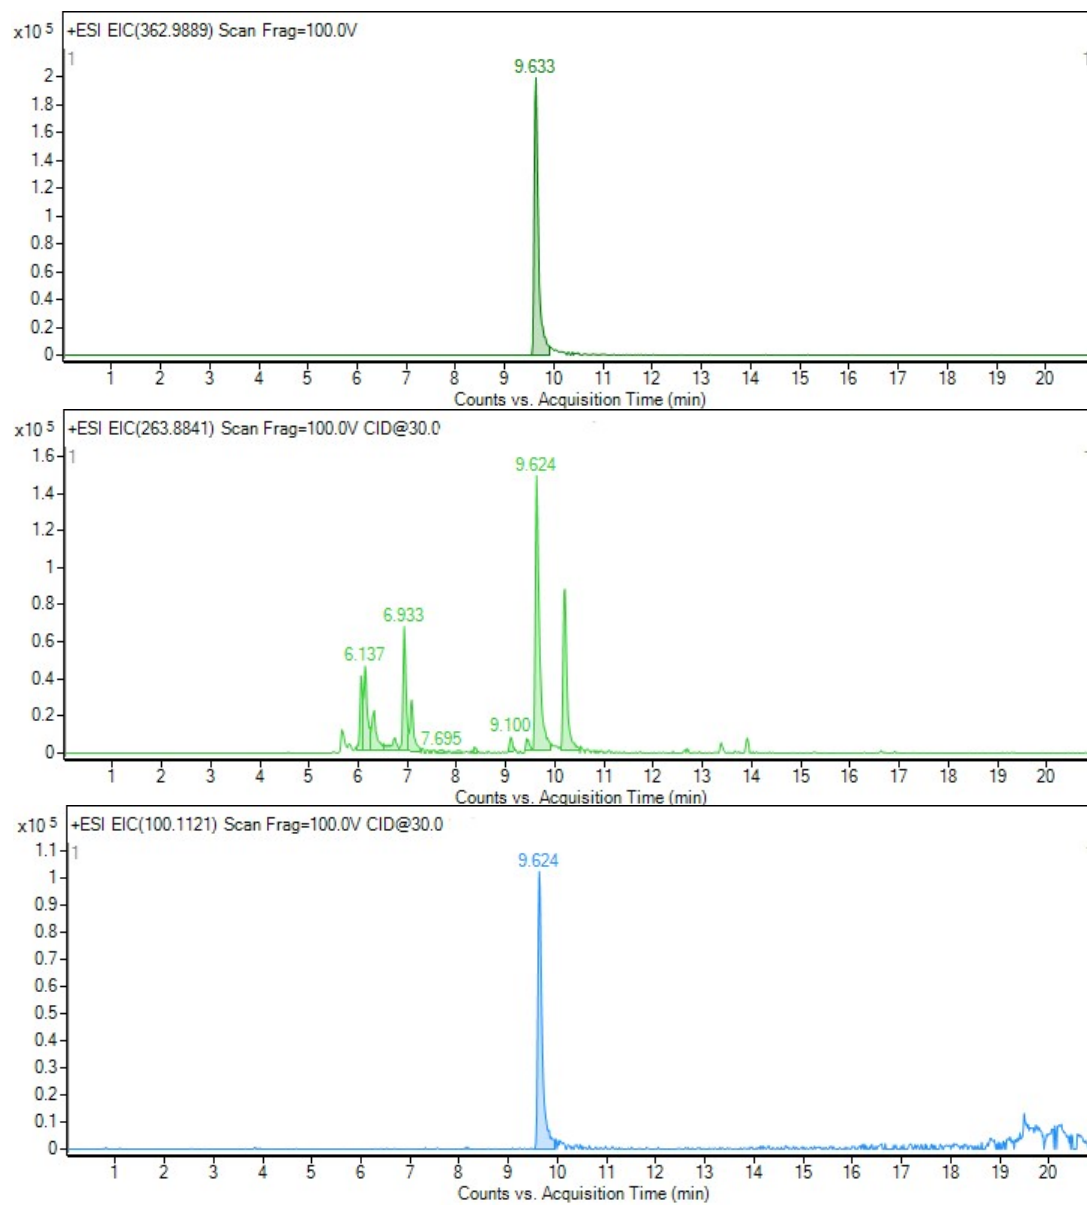

**Figure S2** Mixture\_A: Bromhexine metabolites at T28\_(2-amino-3,5-dibromo-benzyl)-cyclohexyl-amine, C<sub>13</sub>H<sub>18</sub>Br<sub>2</sub>N<sub>2</sub> (8)\_EIC at m/z 362,9889 (green line, [M+H+2]<sup>+</sup>) and its fragments EICs at m/z 263.8841 (30eV, light green line) and 100.1121 (30eV, light blue line).

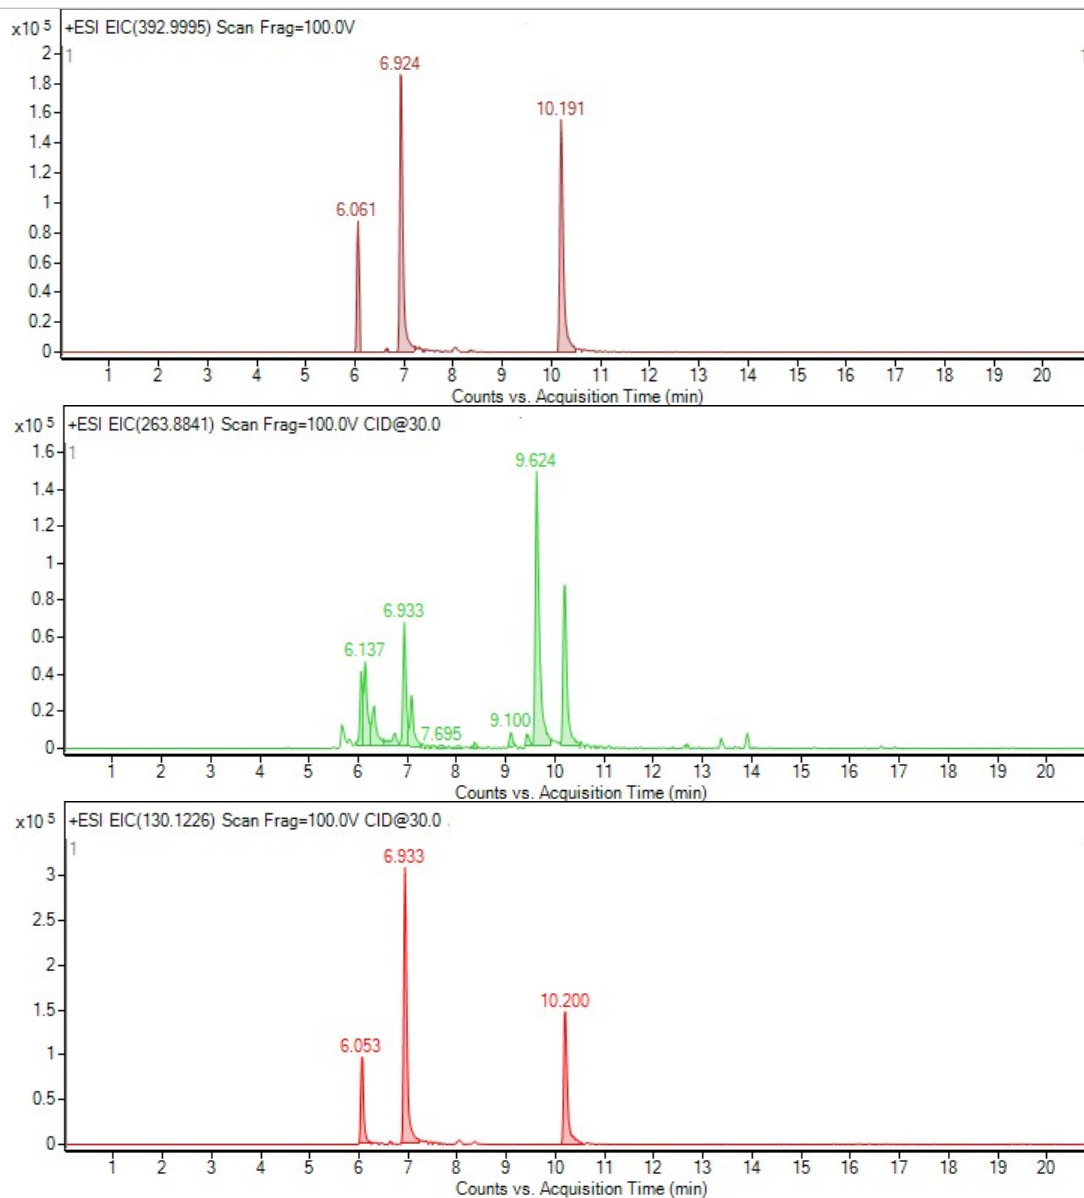

**Figure S3** Mixture\_A: Bromhexine metabolite at T28\_ 2- and 3- and 4-[(2-amino-3,5-dibromobenzyl)-(methyl)-amino]-cyclohexanol (9) EIC of the molecular ion at  $m/z$  392.9995 (brown line,  $[M+H+2]^+$ ), and its fragments EICs at  $m/z$  263.8841(30eV, light green line) and  $m/z$  130.1226 (30eV, red line). Different signals can be observed as consequence of microfauna hydroxylation on different position of amino-cyclohexane ring.



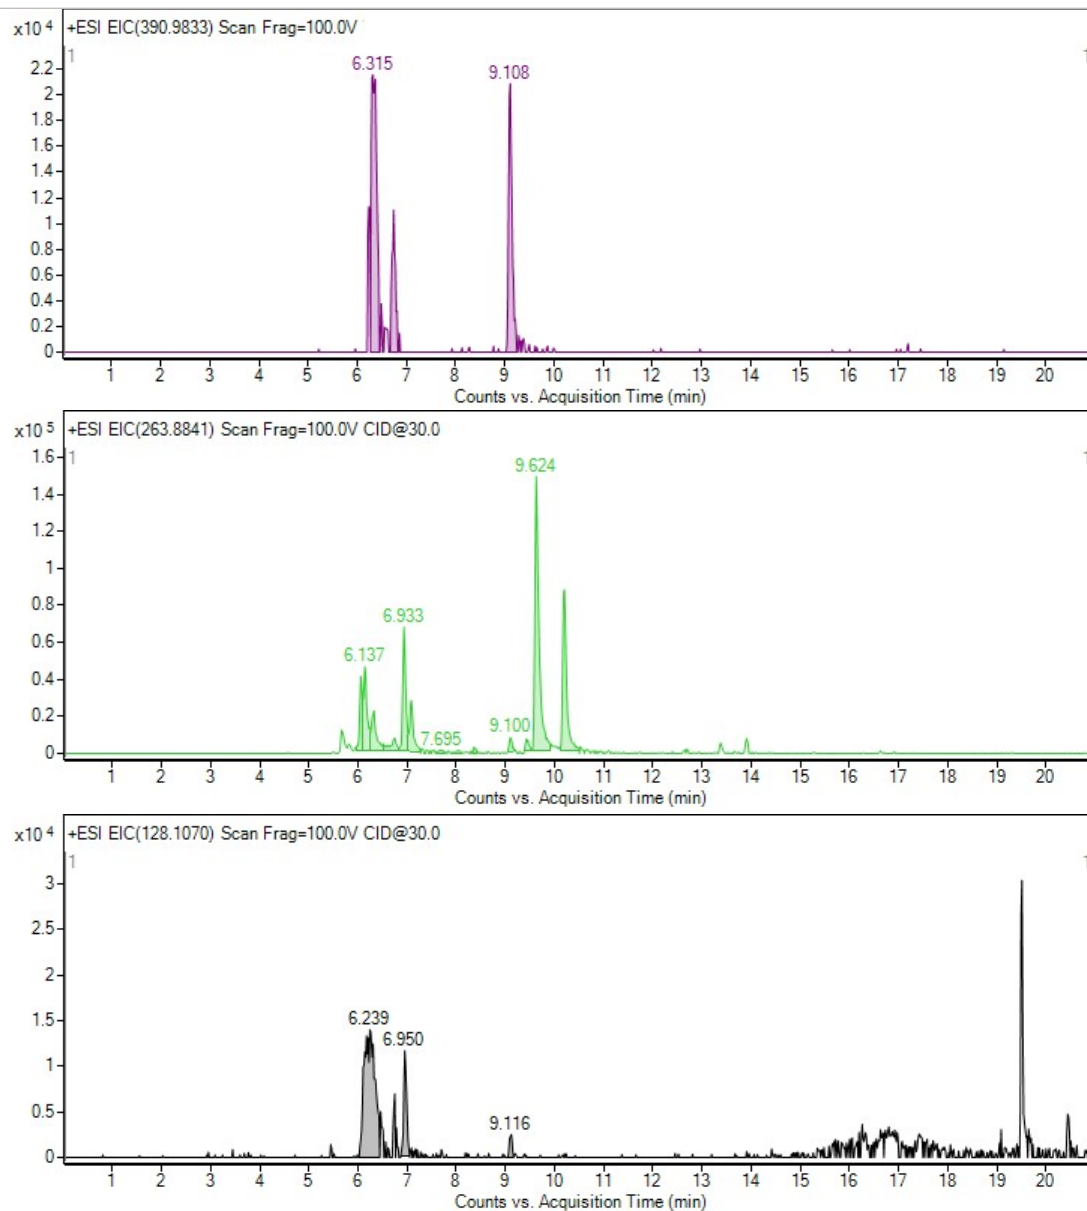

**Figure S4** Mixture\_A: Bromhexine metabolite at T28\_2- and 3- and 4-[(2-amino-3,5-dibromobenzyl)-(methyl)-amino]-cyclohexenol (10)\_EIC of the molecular ion at  $m/z$  390.9839 (violet line,  $[M+H+2]^+$ ), and its fragments EICs at  $m/z$  263.8841(30eV, light green line) and  $m/z$  128.1070 (30eV, grey line). Different signals can be observed as consequence of microfauna hydroxylation and double bond formation on different position of amino-cyclohexane ring.

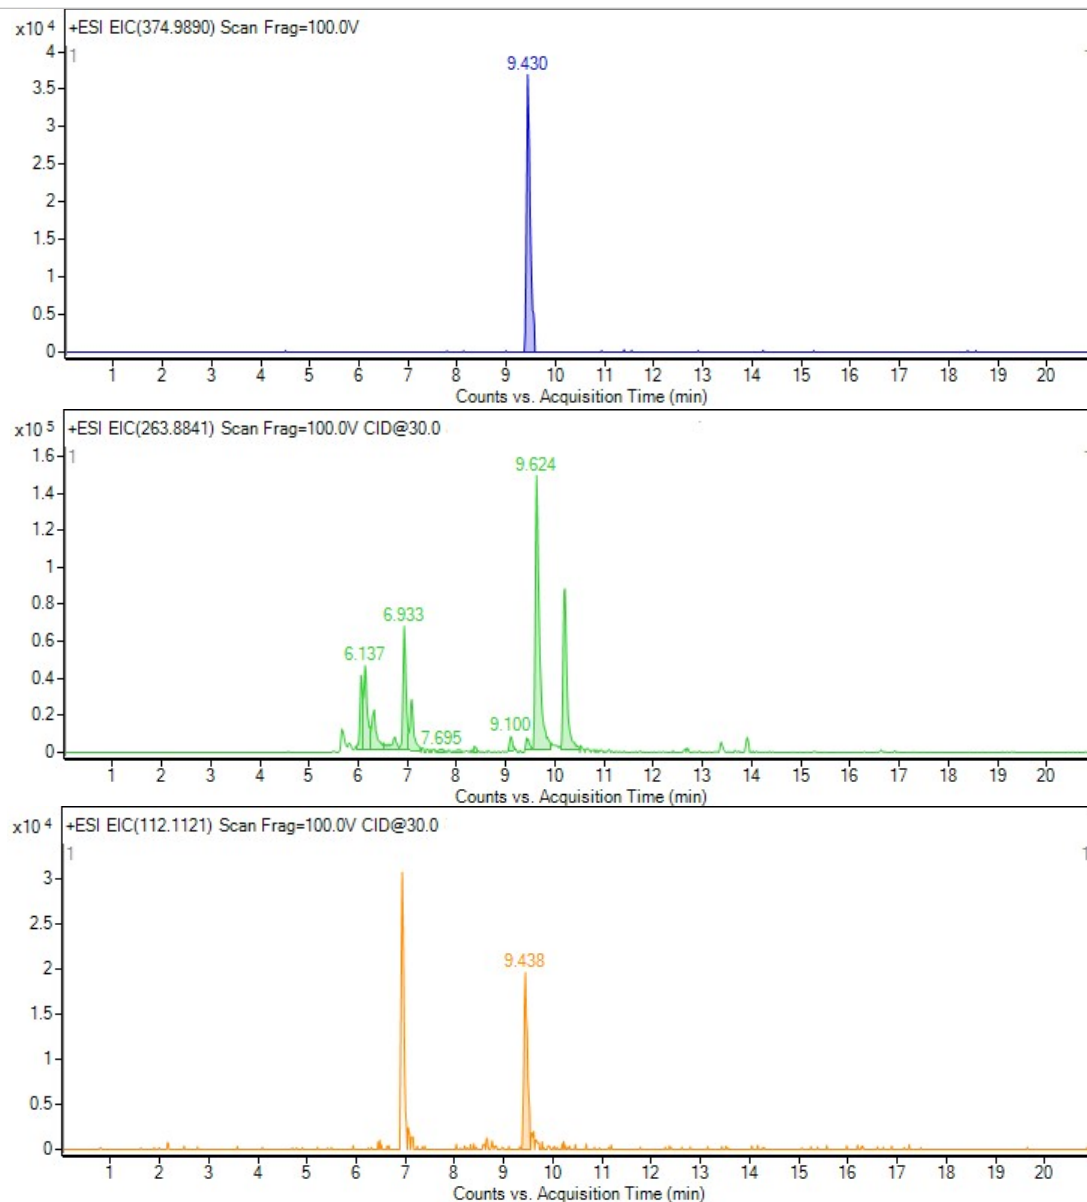

**Figure S5** Mixture\_A: Bromhexine metabolite at T28\_2,4-dibromo-6-((cyclohex-2-en-1-yl-(methyl)-amino)-methyl)-aniline (**11**)\_EIC of the molecular ion at  $m/z$  374.9890 (blue line,  $[M+H+2]^+$ ), and its fragments EICs at  $m/z$  263.8841(30eV, light green line) and  $m/z$  112.1121 (30eV, orange line). Double bond in the cyclohexane ring position was not defined. Different signals in the EIC chromatogram of the fragment ion at  $m/z$  263.8841 can be observed as the fragment is common to other bromhexine metabolites. Potentially, several metabolites with a double bond in the amino-cyclohexane ring not well separated under the same chromatographic peak can be presents.

**Table S4.** Experimental parameters for the respirometric test

| Sample concentration | Volume of mineral media | Volume of the vessel |
|----------------------|-------------------------|----------------------|
| 50 mg/L              | 400 ml                  | 1L                   |
| 100 mg/L             | 400 ml                  | 1L                   |
| 1 g/L                | 100 ml                  | 1L                   |

**Table S5.** UHPLC ESI-qToF

Methods: Elution gradient

| Time (min)      | A% | B% |
|-----------------|----|----|
| 0,0             | 99 | 1  |
| 1,0             | 99 | 1  |
| 2,0             | 75 | 25 |
| 10,0            | 50 | 50 |
| 11,0            | 50 | 50 |
| 15,0            | 25 | 75 |
| 17,0            | 15 | 85 |
| 19,0            | 1  | 99 |
| 19,5            | 1  | 99 |
| 21,0            | 99 | 1  |
| 24,0 (post run) | 99 | 1  |

**Table S6.** UHPLC ESI- qToF Methods: MS parameters

| Instrumental parameters               | ESI- | ESI+ |
|---------------------------------------|------|------|
| Gas temperature (°C)                  | 325  | 325  |
| Gas flow (L min <sup>-1</sup> )       | 11   | 11   |
| Nebulizer (psig)                      | 35   | 35   |
| Sheat gas temperature (°C)            | 350  | 350  |
| Sheat gas flow (L min <sup>-1</sup> ) | 12   | 12   |
| Vcap                                  | 3500 | 3500 |
| Nozzle voltage (V)                    | 0    | 1000 |
| Fragmentor                            | 100  | 100  |
| Skimmer                               | 65   | 65   |
| Octopole RF Peak                      | 750  | 750  |

**Table S7.** Statistical Model performance evaluation by means of Q<sup>2</sup> and R<sup>2</sup>X,

| Sample              | Q <sup>2</sup> | R <sup>2</sup> X |
|---------------------|----------------|------------------|
| Mixture_A 100 mg/L  | 0,849          | 0,937            |
| Mixture_B 100 mg/L  | 0,818          | 0,953            |
| Mixture_A 1000 mg/L | 0,669          | 0,937            |
| Mixture_B 1000 mg/L | 0,864          | 0,989            |

**Table S8: Hotelling T<sup>2</sup> and DModX**

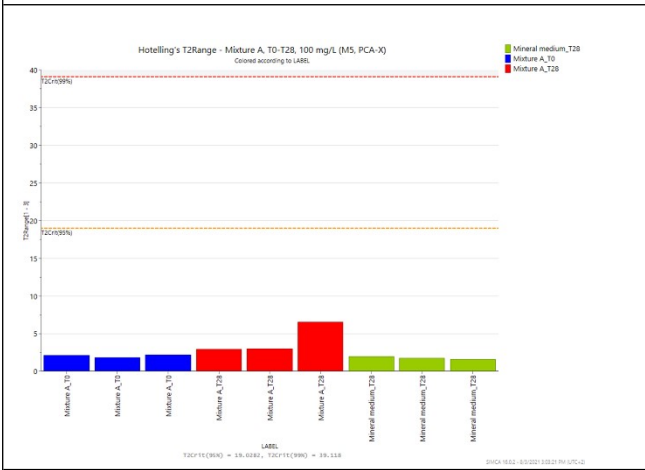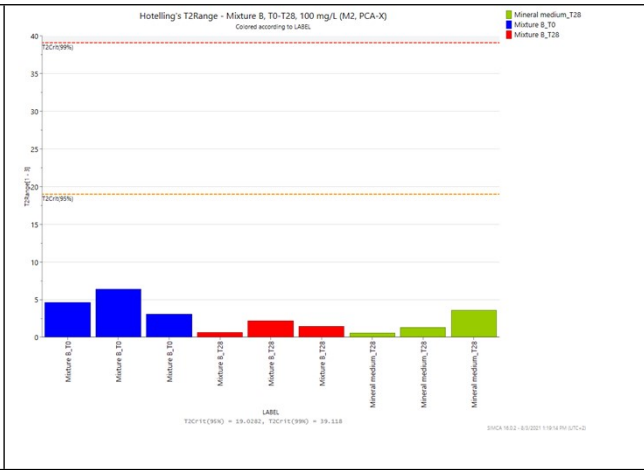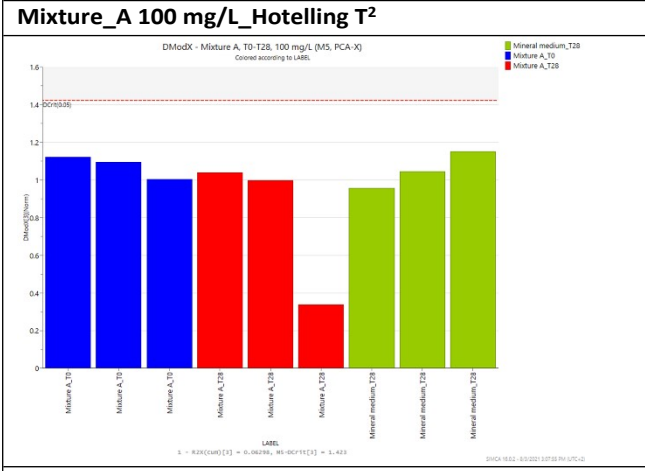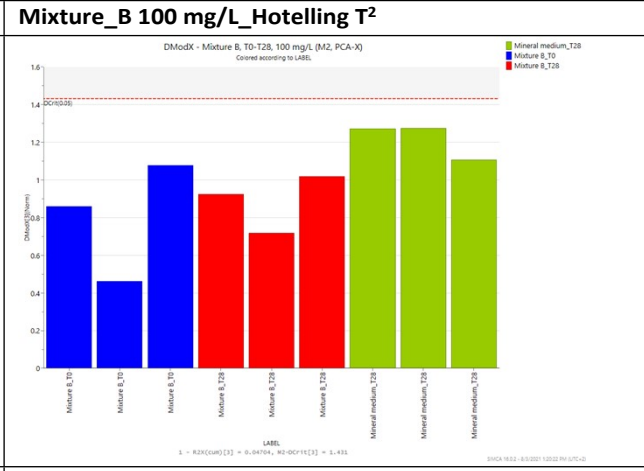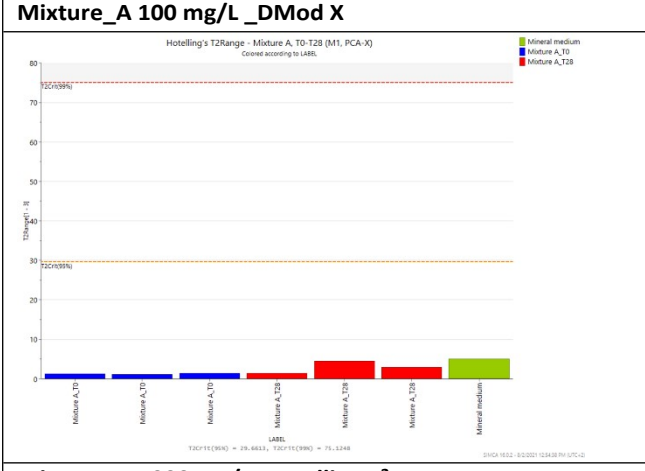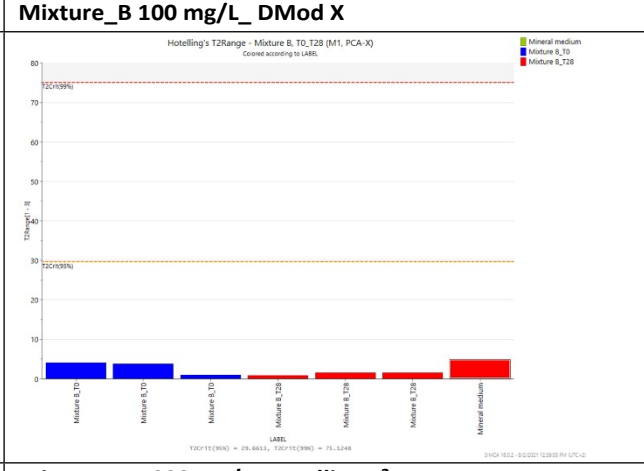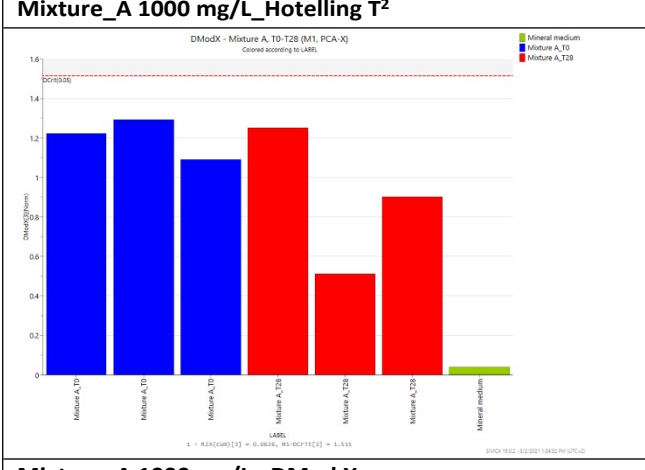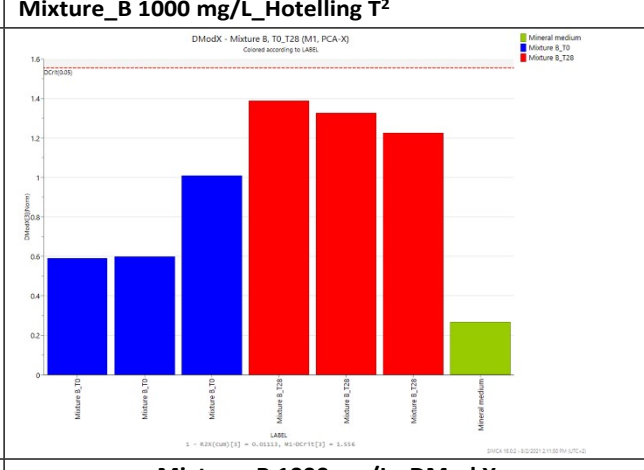

**Mixture\_A 1000 mg/L\_DMod X**

**Mixture\_B 1000 mg/L\_DMod X**

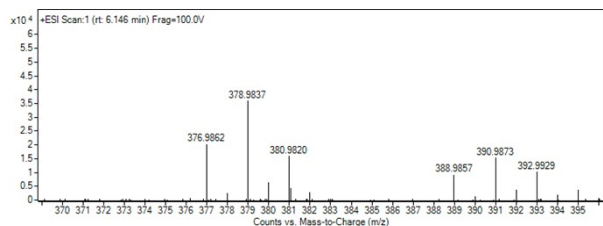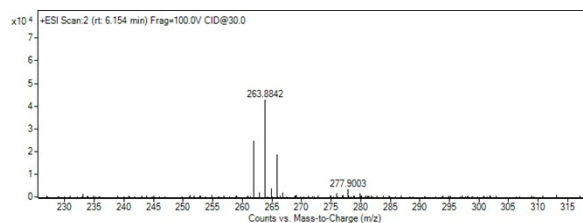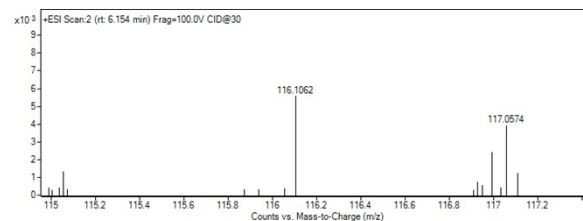

**Figure S6 Spectrum of Structure 7\_ Ambroxol (E-4-HDMB).** Accurate mass spectrum at  $m/z$  378,9837 and 6.146 min (right) then the corresponding MS/MS fragmentation pattern at 30eV (left) with ions at  $m/z$  263,8842 and 116,1062

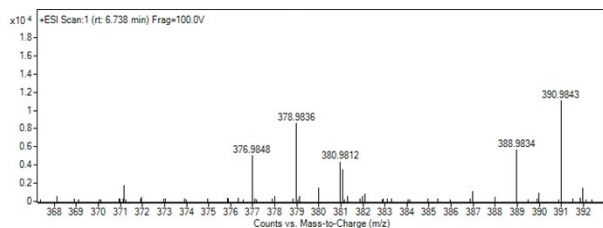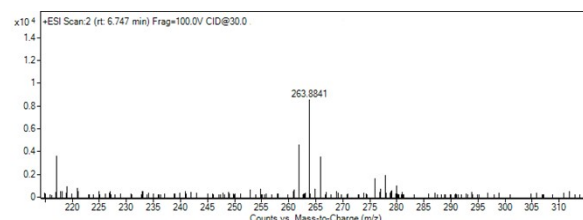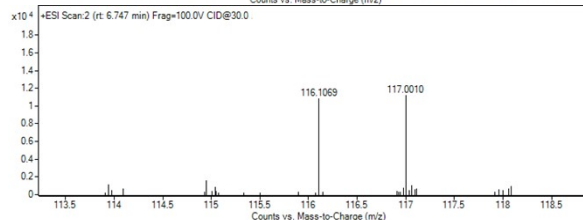

i) Metabolite at 6.738 min, Accurate mass spectrum at  $m/z$  378,9836 (right) then the corresponding MS/MS fragmentation pattern at 30eV (left) with ions at  $m/z$  263,8841 and 116,1069

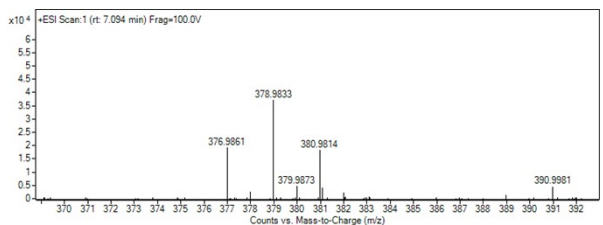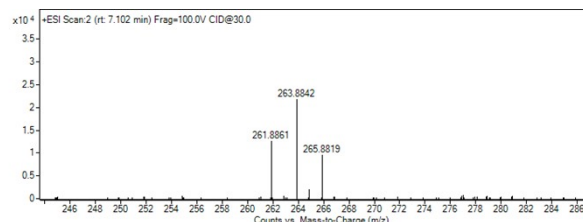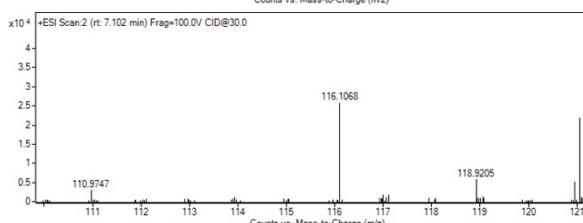

ii) Metabolite at 7.094 min, Accurate mass spectrum at  $m/z$  378,9833 (right) then the corresponding MS/MS fragmentation pattern at 30eV (left) with ions at  $m/z$  263,8842 and 116,1068

**Figure S7 Spectrum of Structures 7a\_ [(2-amino-3,5 dibromobenzyl)-amino]- cyclohexanol**  
(Other Ambroxol isomers with OH in different position on amino cyclohexane ring).

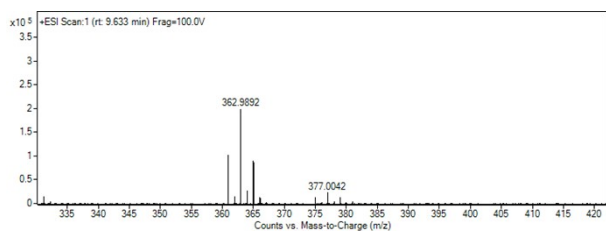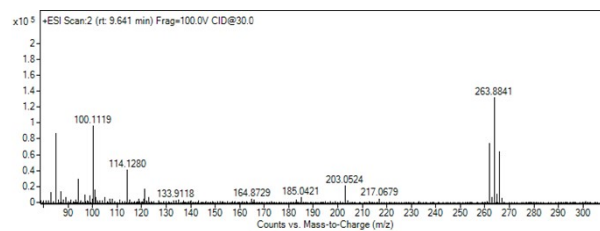

**Figure S8 Spectrum of Structure 8** [(2-amino-3,5-dibromo-benzyl)-cyclohexyl]-amine. Accurate mass spectrum at  $m/z$  362,9992 and 9.633 min (right) then the corresponding MS/MS fragmentation pattern at 30eV (left) with ions at  $m/z$  263,8841 and 110,1119

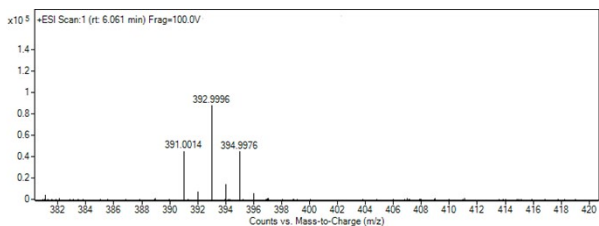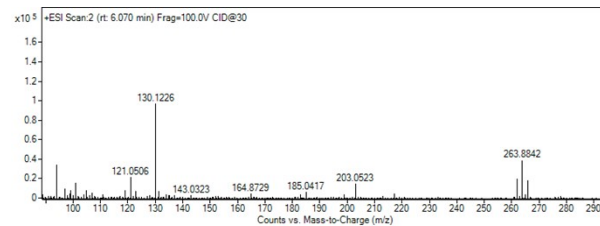

**i)** Metabolite at 6.061 min. Accurate mass spectrum at  $m/z$  392,9996 (right), then the corresponding MS/MS fragmentation pattern at 30eV (left) with ions at  $m/z$  263,8842 and 130,1226

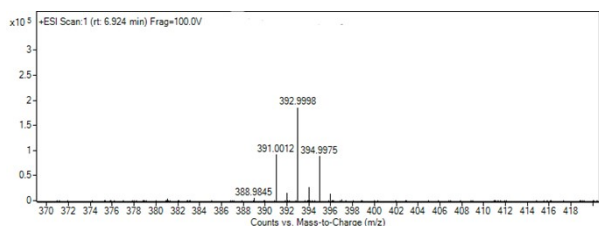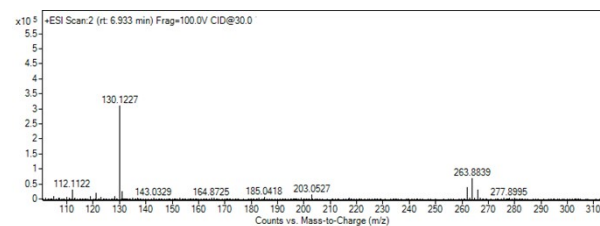

**ii)** Metabolite at 6.924 min. Accurate mass spectrum at  $m/z$  392,9998 (right) then the corresponding MS/MS fragmentation pattern at 30eV (left) with ions at  $m/z$  263,8839 and 130,1227

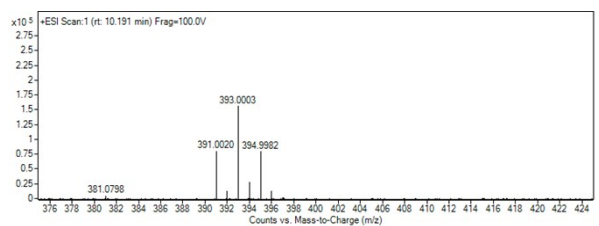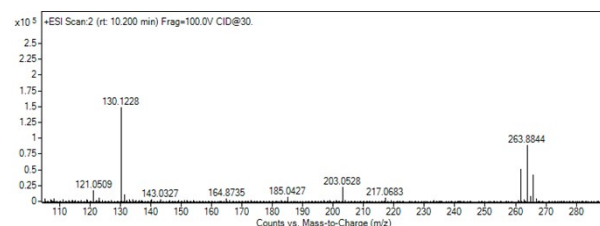

**iii)** Metabolite at 10.191 min. Accurate mass spectrum at  $m/z$  393,0003 (right) then the corresponding MS/MS fragmentation pattern at 30eV (left) with ions at  $m/z$  263,8844 and 130,1228

**Figure S9 Spectrum of Structures 9** [(2-amino-3,5-dibromobenzyl)-(methyl)-amino]-cyclohexanol, (Different isomers with OH in different position on amino cyclohexane ring).

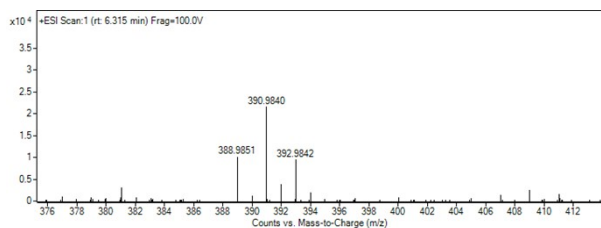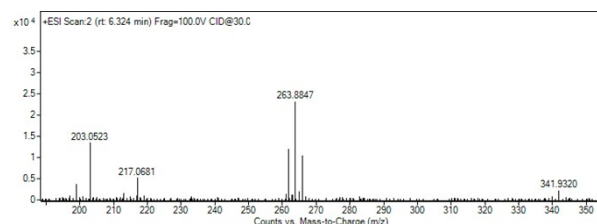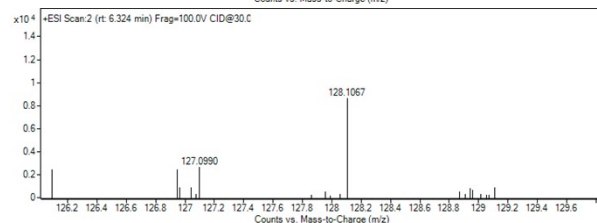

i) Metabolite at 6.315 min. Accurate mass spectrum at  $m/z$  390,9840 (right) then the corresponding MS/MS fragmentation pattern at 30eV (left) with ions at  $m/z$  263,8847 and 128,1067

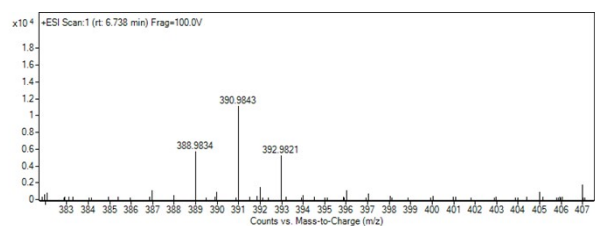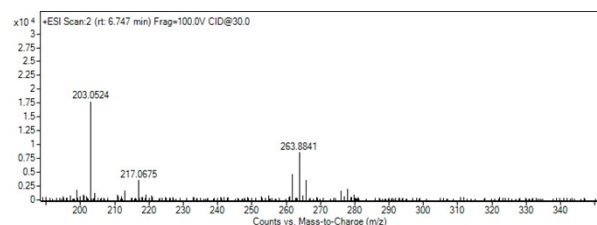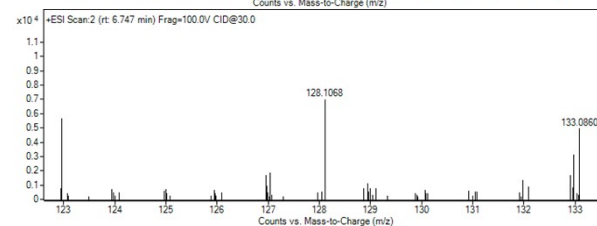

ii) Metabolite at 6.738 min. Accurate mass spectrum at  $m/z$  390,9843 (right) then the corresponding MS/MS fragmentation pattern at 30eV (left) with ions at  $m/z$  263,8841 and 128,1068

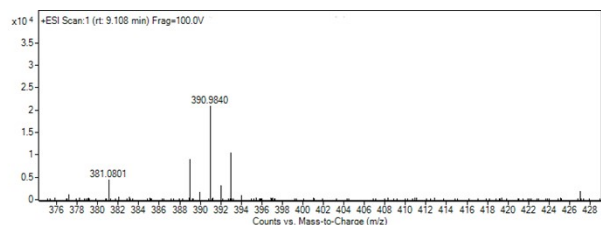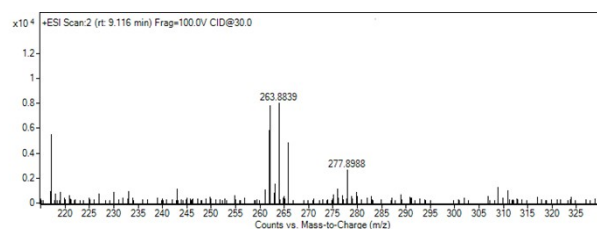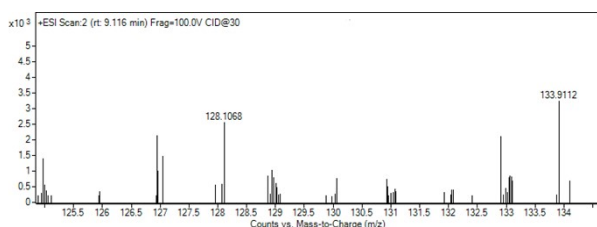

iii) Metabolite at 9.108 min. Accurate mass spectrum at  $m/z$  390,9840 (right) then the corresponding MS/MS fragmentation pattern at 30eV (left) with ions at  $m/z$  263,8839 and 128,1068

**Figure S10 Spectrum of Structure 10\_[(2-amino-3,5-dibromobenzyl)-(methyl)-amino]-cyclohexenol, (different isomers with OH in ortho, meta or para position and a double bond in the cyclohexane ring in position not defined).**

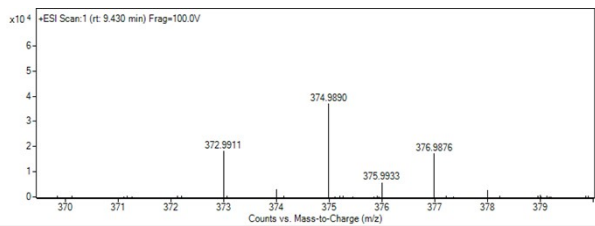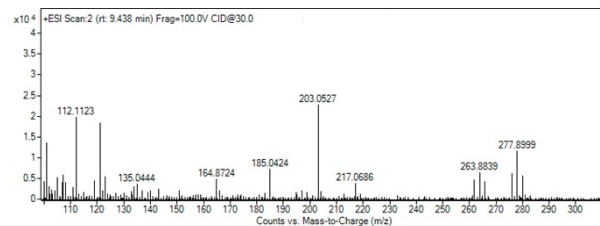

**Figure S11 Spectrum of Structure 11\_2,4-dibromo-6-((cyclohex-2-en-1-yl-(methyl)-amino)-methyl)-aniline** (double bond in the cyclohexane ring position not defined). Accurate mass spectrum at m/z 374,9890 and 9.430 min (right) then the corresponding MS/MS fragmentation pattern at 30eV (left) with ions at m/z 263,8839 and 112,1123
